# Supplementary material for: An accurate and sensitive determination of selected pesticides in mixed fruit juice samples using the combination of a simple and efficient microextraction method and GC-MS with a matrix matching calibration strategy
Source: Royal Society of Chemistry journal article supplement (doi:10.1039/d3ay02327c), 2024-01-01
Supplement: d3ay02327c1.pdf [file d3ay02327c1.pdf]

**An accurate and sensitive determination of selected pesticides in mixed fruit juice  
samples using the combination of a simple and efficient microextraction method and  
GC-MS with matrix matching calibration strategy**

**Supplementary Material**

**Table S1.** The optimum conditions for the developed VA-SFDF-LPME method.

| Parameter          | Optimum condition  |
|--------------------|--------------------|
| Spraying number    | 1                  |
| Extraction Solvent | 1,2-dichloroethane |
| Sample volume      | 12.0 mL            |
| Mixing type        | Vortex             |
| Mixing period      | 30 s               |

**Table S2.** %RSD values belonging to low, medium and high concentration in calibration plot levels for the analytes.

| <b>Analyte</b> | <b>Low Concentration Level, µg/kg</b>    | <b>%RSD</b> |
|----------------|------------------------------------------|-------------|
| Chlorbenside   | 4.93                                     | 4.0 (n=6)   |
| Mepanipirim    | 0.11                                     | 5.9 (n=6)   |
| Hexaconazole   | 4.91                                     | 5.5 (n=6)   |
| Norflurazon    | 0.58                                     | 3.4 (n=6)   |
| Fenhexamid     | 5.06                                     | 6.7 (n=6)   |
| Ipconazole     | 4.88                                     | 5.2 (n=6)   |
| Fluridone      | 0.57                                     | 6.7 (n=6)   |
| Indoxacarb     | 4.91                                     | 3.3 (n=6)   |
| <b>Analyte</b> | <b>Medium Concentration Level, µg/kg</b> | <b>RSD%</b> |
| Chlorbenside   | 26.17                                    | 5.3 (n=3)   |
| Mepanipirim    | 1.11                                     | 5.0 (n=6)   |
| Hexaconazole   | 26.10                                    | 6.6 (n=3)   |
| Norflurazon    | 10.04                                    | 4.9 (n=3)   |
| Fenhexamid     | 26.89                                    | 9.2 (n=3)   |
| Ipconazole     | 25.92                                    | 14.2 (n=3)  |
| Fluridone      | 2.62                                     | 10.0 (n=6)  |
| Indoxacarb     | 26.11                                    | 3.3 (n=3)   |
| <b>Analyte</b> | <b>High Concentration Level, µg/kg</b>   | <b>RSD%</b> |
| Chlorbenside   | 100.94                                   | 6.2 (n=3)   |
| Mepanipirim    | 4.93                                     | 3.1 (n=3)   |
| Hexaconazole   | 100.65                                   | 5.9 (n=3)   |
| Norflurazon    | 103.42                                   | 3.9 (n=3)   |
| Fenhexamid     | 103.68                                   | 5.3 (n=3)   |
| Ipconazole     | 99.97                                    | 3.3 (n=3)   |
| Fluridone      | 4.94                                     | 4.2 (n=3)   |
| Indoxacarb     | 100.68                                   | 0.4 (n=3)   |

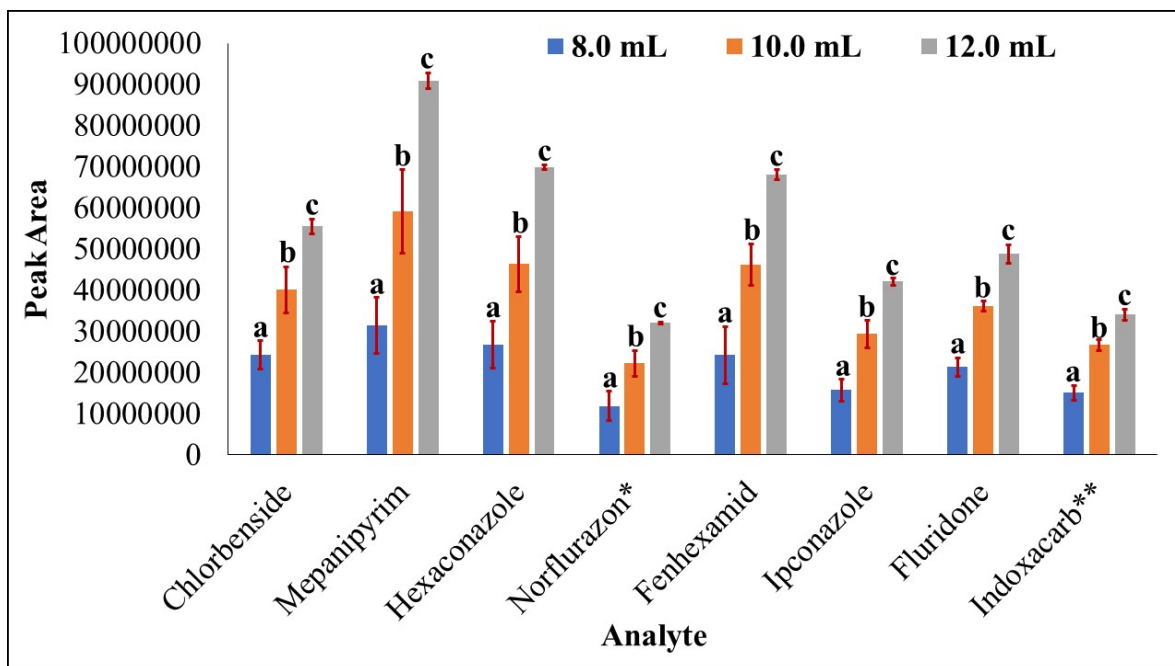

**Figure S1.** Sample volume optimization (\* and \*\* indicates 2 and 10 times scaled up peak areas and their standard deviations, respectively,  $n=3$ ). The concentrations of chlorbenside, mepanipyrim, hexaconazole, norflurazon, fenhexamid, ipconazole, fluridone, indoxacarb were 50.01  $\mu\text{g/kg}$ , 49.23  $\mu\text{g/kg}$ , 49.87  $\mu\text{g/kg}$ , 51.24  $\mu\text{g/kg}$ , 51.37  $\mu\text{g/kg}$ , 49.53  $\mu\text{g/kg}$ , 50.14  $\mu\text{g/kg}$ , 49.88  $\mu\text{g/kg}$ , respectively. Constant parameters: 1,2-dichloroethane as the extraction solvent, one spraying, and 30 s of vortex mixing.

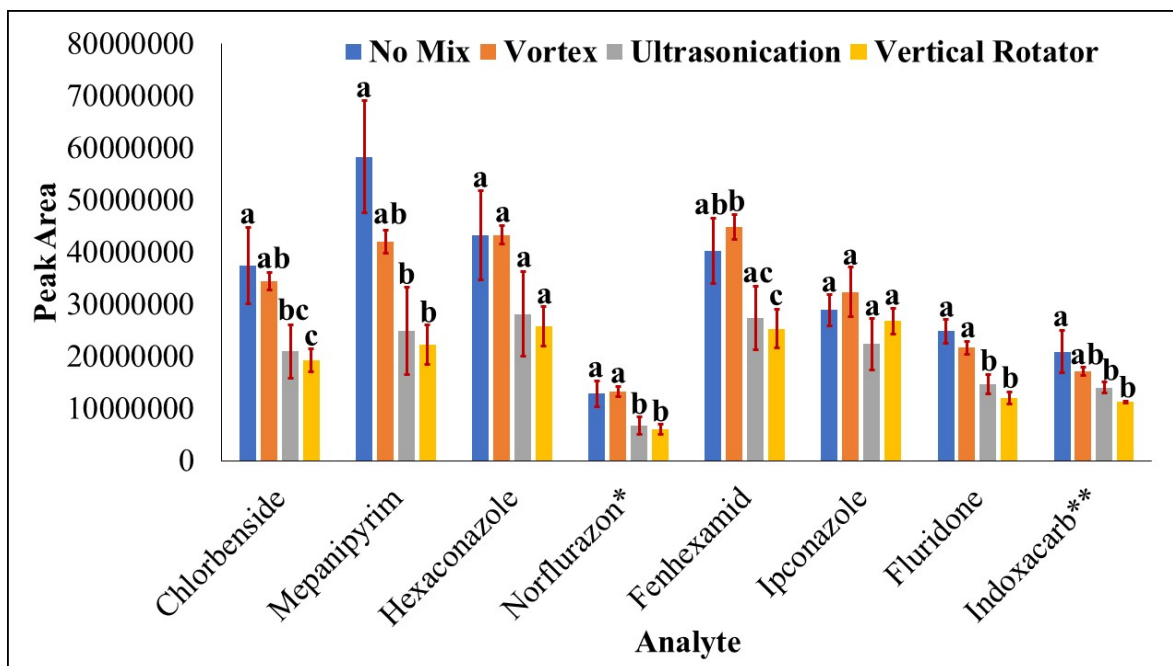

**Figure S2.** Mixing type optimization (\* and \*\* indicates 2 and 10 times scaled up peak areas and their standard deviations, respectively, n=3). The concentrations of chlorbenside, mepanipyrim, hexaconazole, norflurazon, fenhexamid, ipconazole, fluridone, indoxacarb were 40.63  $\mu\text{g/kg}$ , 40.00  $\mu\text{g/kg}$ , 40.51  $\mu\text{g/kg}$ , 41.63  $\mu\text{g/kg}$ , 41.73  $\mu\text{g/kg}$ , 40.24  $\mu\text{g/kg}$ , 40.73  $\mu\text{g/kg}$ , 40.52  $\mu\text{g/kg}$ , respectively. Constant parameters: 1,2-dichloroethane as the extraction solvent, 12.0 mL of sample volume, one spraying, and 30 s of each mixing process.

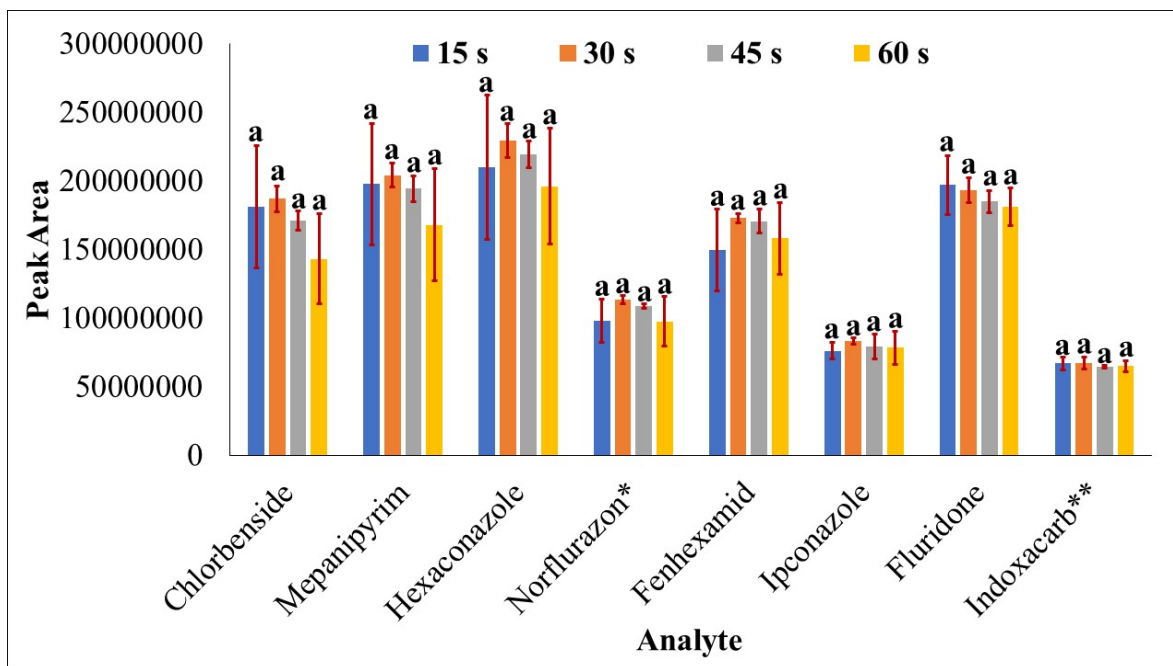

**Figure S3.** Mixing period optimization (\* and \*\* indicates 2 and 10 times scaled up peak areas and their standard deviations, respectively, n=3). The concentrations of chlorbenside, mepanipyrim, hexaconazole, norflurazon, fenhexamid, ipconazole, fluridone, indoxacarb were 37.14  $\mu\text{g/kg}$ , 36.57  $\mu\text{g/kg}$ , 37.04  $\mu\text{g/kg}$ , 38.05  $\mu\text{g/kg}$ , 38.15  $\mu\text{g/kg}$ , 36.79  $\mu\text{g/kg}$ , 37.24  $\mu\text{g/kg}$ , 37.05  $\mu\text{g/kg}$ , respectively. Constant parameters: 1,2-dichloroethane as the extraction solvent, 12.0 mL of sample volume, one spraying, and vortex mixing.

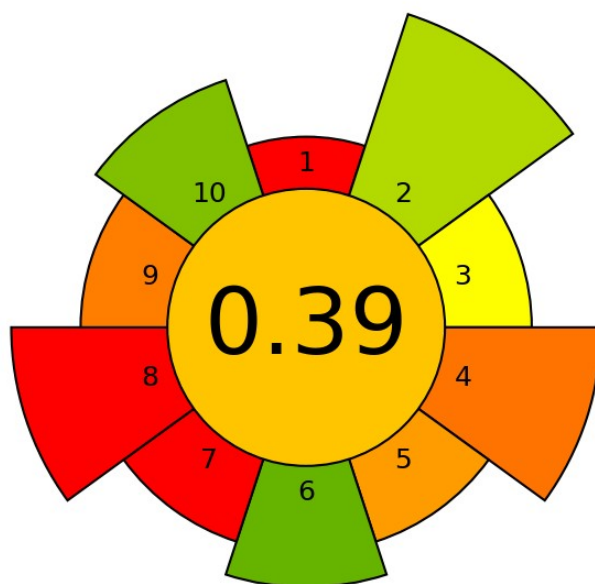

**Figure S4.** The pictogram generated from the AGREEprep software for the developed VA-SFDF-LPME-GC-MS method.

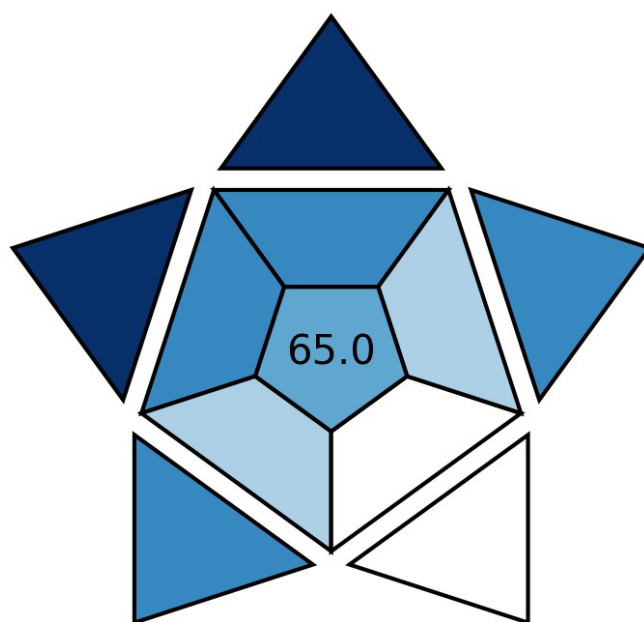

**Figure S5.** The pictogram produced from the BAGI software for the developed VA-SFDF-LPME-GC-MS method.
